# Supplementary material for: Microbiome of Invasive Tick Species Haemaphysalis longicornis in North Carolina, USA
Source: MDPI journal article supplement (doi:10.3390/insects15030153), 2024-02-24
Supplement: s1 [file s1]

**Table S1.** Summary of this table includes the location in which they were collected and the collection type

| Location (County) | Stage/Sex            | Year       | Collection Type |
|-------------------|----------------------|------------|-----------------|
| Ashe              | Female               | 2021       | Cattle          |
| Buncombe          | Nymph                | 2019 -2020 | Dragging        |
| Catawba           | Nymph                | 2021       | Dragging        |
| Surry             | Female/ Larve/ Nymph | 2019-2020  | Dragging        |
| Surry             | Female               | 2020       | Calf            |
| Madison           | Nymph                | 2019       | Dragging        |

**Table S2.** Genus-level bacterial taxa with differential abundances between ALT larvae, nymphs, and adults; determined by ANCOM

| Genus                                      | ANCOM<br>W-Value | Average (SE) Abundance (%) |               |               |
|--------------------------------------------|------------------|----------------------------|---------------|---------------|
|                                            |                  | Larvae                     | Nymphs        | Adults        |
| <i>Coxiella</i>                            | 495              | 8.90 (1.76)                | 72.27 (4.28)  | 47.45 (6.19)  |
| <i>Staphylococcus</i>                      | 481              | 6.39 (1.00)                | 0.48 (0.30)   | 8.22 (3.36)   |
| <i>Sphingobium</i>                         | 455              | 5.59 (1.02)                | 1.11 (0.37)   | 0.91 (0.37)   |
| <i>Dietziaceae unclassified genus</i>      | 451              | 3.53 (0.89)                | 0.24 (0.24)   | 0.54 (0.11)   |
| <i>Corynebacterium</i>                     | 457              | 1.46 (0.27)                | 0.15 (0.08)   | 1.40 (0.59)   |
| <i>Propionibacterium</i>                   | 478              | 2.06 (1.01)                | 0.26 (0.10)   | 0.04 (0.01)   |
| <i>Rhizobium</i>                           | 473              | 1.37 (0.24)                | 0.17 (0.05)   | 0.56 (0.14)   |
| <i>Clostridium</i>                         | 458              | 0.006 (0.004)              | 0.007 (0.006) | 0.712 (0.209) |
| <i>Dermabacteraceae unclassified genus</i> | 446              | 0.437 (0.099)              | 0.025 (0.025) | 0.168 (0.040) |

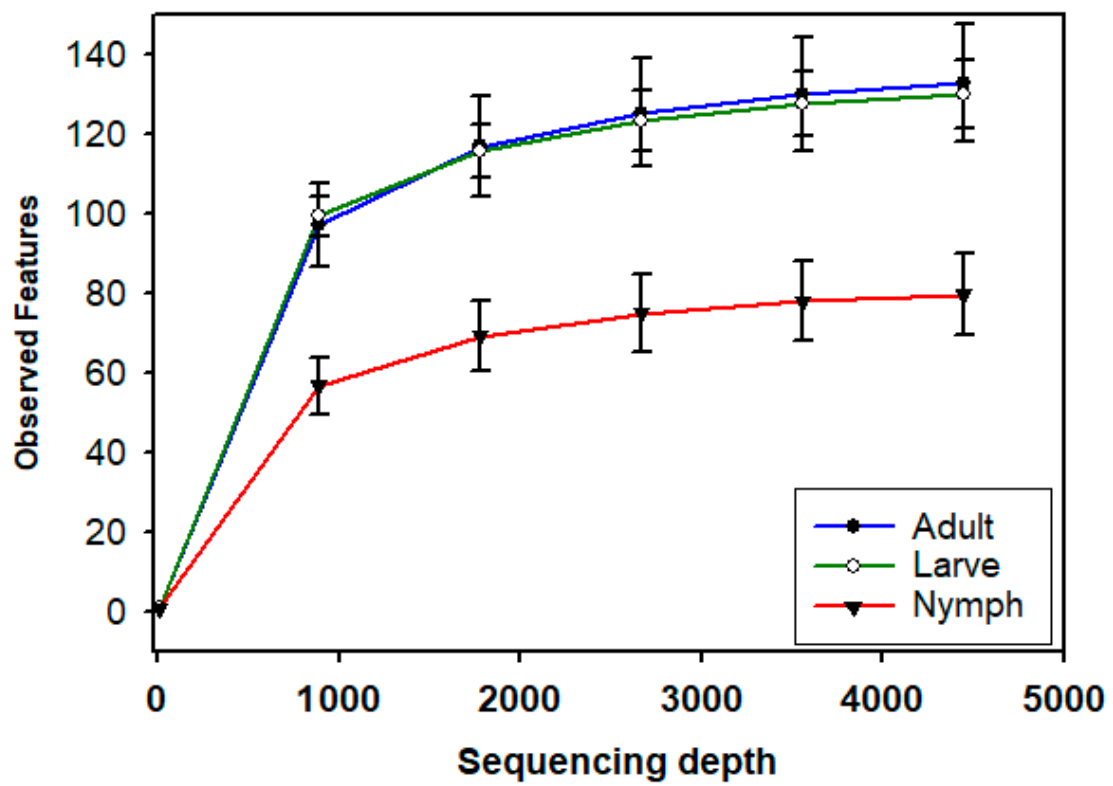

**Figure S1.** Rarefaction curves of observed features in larve, nymph and adult ticks. Error bars represent the standard error of the mean.

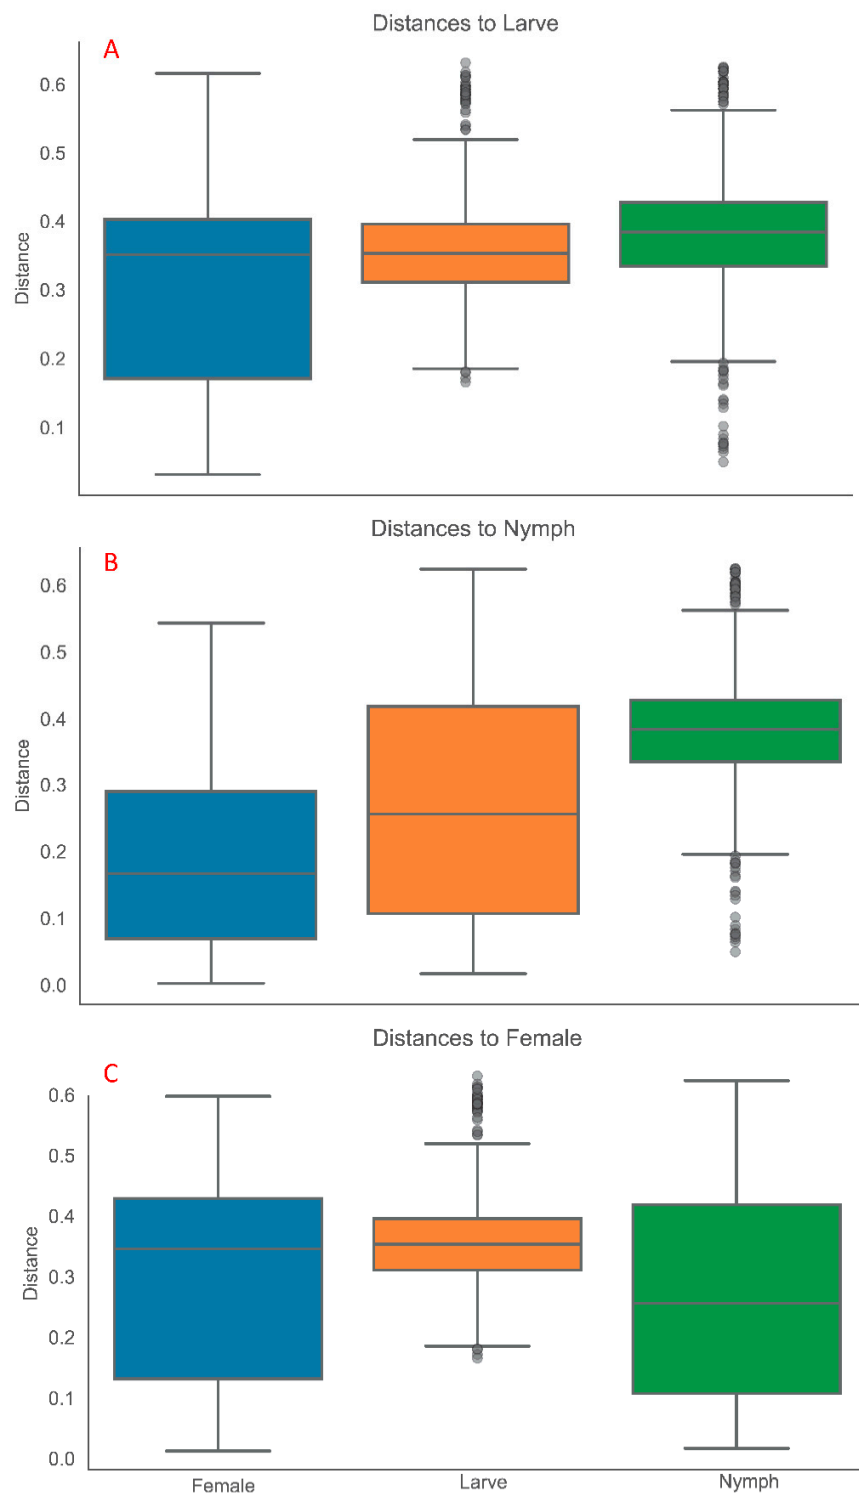

**Figure S2.** Beta diversity (box plot) measures of the on bacterial community composition (weighted UniFrac) to different stages.

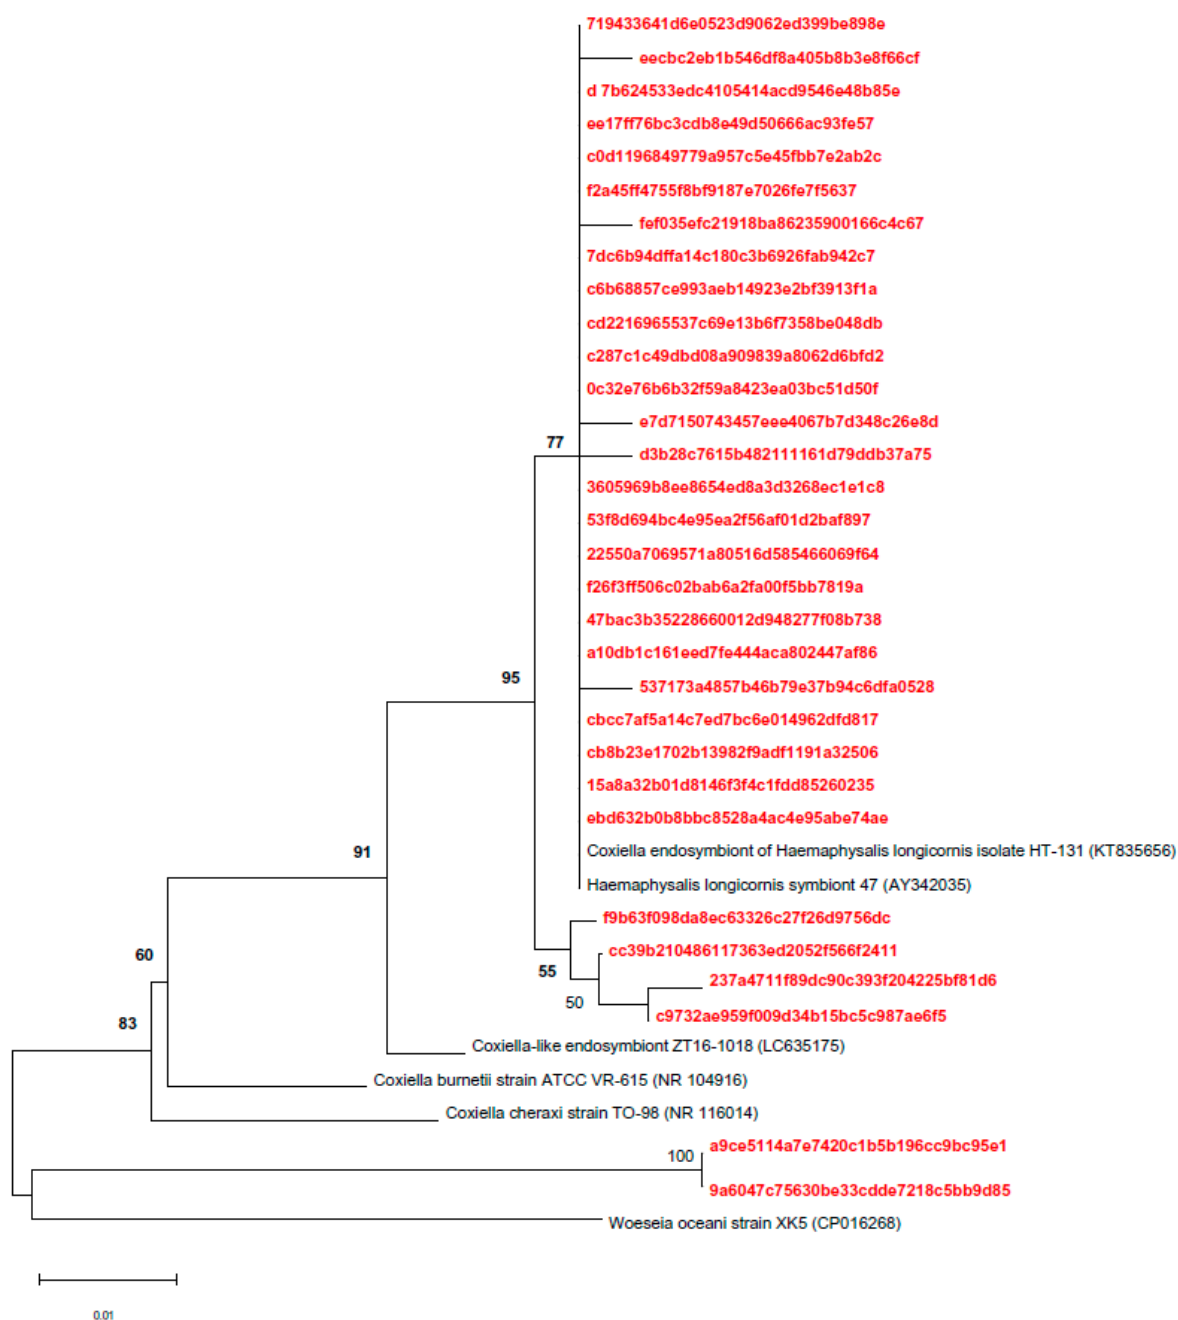

**Figure S3.** Phylogenetic analysis of *Coxiella* ASVs identified in this study (in red text) and closest related species and constructed by the neighbor-joining (NJ) method based on partial 16S rRNA gene. Bootstrap values above 50 % based on 1000 replications are indicated at the branches. *Woeseia oceani* strain XK5 (CP016268) used as outgroup.

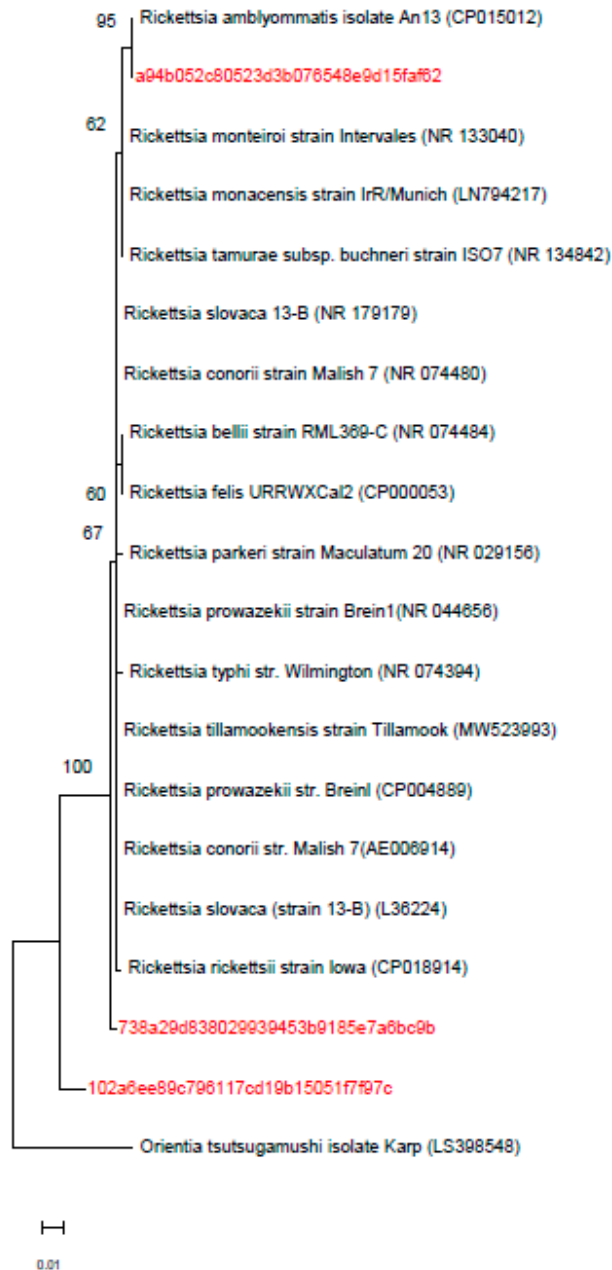

**Figure S4.** Phylogenetic analysis of *Rickettsia* ASVs identified in this study (in red text) and closest related species and constructed by the neighbor-joining (NJ) method based on 16S rRNA gene. Bootstrap values above 50 % based on 1000 replications are indicated at the branches. *Orientia tsutsugamushi* isolate Karp (LS398548) used as outgroup.

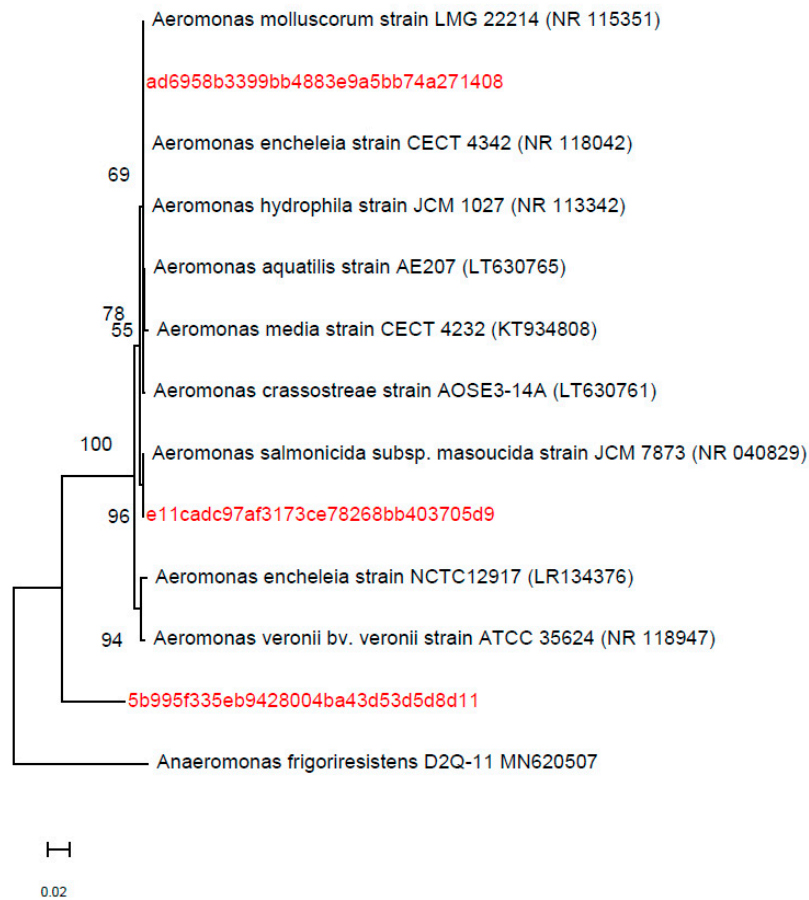

**Figure S5.** Phylogenetic analysis of *Aeromonas* ASVs identified in this study (in red text) and closest related species and tree constructed by the neighbor-joining (NJ) method based on 16S rRNA gene. Bootstrap values above 50 % based on 1000 replications are indicated at the branches. *Anaeromonas frigori-resistens* D2Q-11 MN620507 used as outgroup.
